# Supplementary material for: Fasiglifam (TAK‐875) has dual potentiating mechanisms via Gαq‐GPR40/FFAR1 signaling branches on glucose‐dependent insulin secretion
Source: PubMed Central journal article supplement — Pharmacol Res Perspect. 2016 Apr 27;4(3):e00237. doi: 10.1002/prp2.237 (PMC4876146; doi:10.1002/prp2.237), 2016-04-27
Supplement: PRP2-4-e00237-s001.pdf [file PRP2-4-e00237-s001.pdf]

1 **Supplemental data**

2

3 **Fasiglifam (TAK-875) has dual potentiating mechanisms via Gαq-GPR40/FFAR1**

4 **signaling branches on glucose-dependent insulin secretion**

5

6 Kensuke Sakuma, Chiori Yabuki, Minoru Maruyama, Akiko Abiru, Hidetoshi Komatsu,

7 Nobuyuki Negoro, Yoshiyuki Tsujihata, Koji Takeuchi, Yugo Habata and Masaaki Mori

8

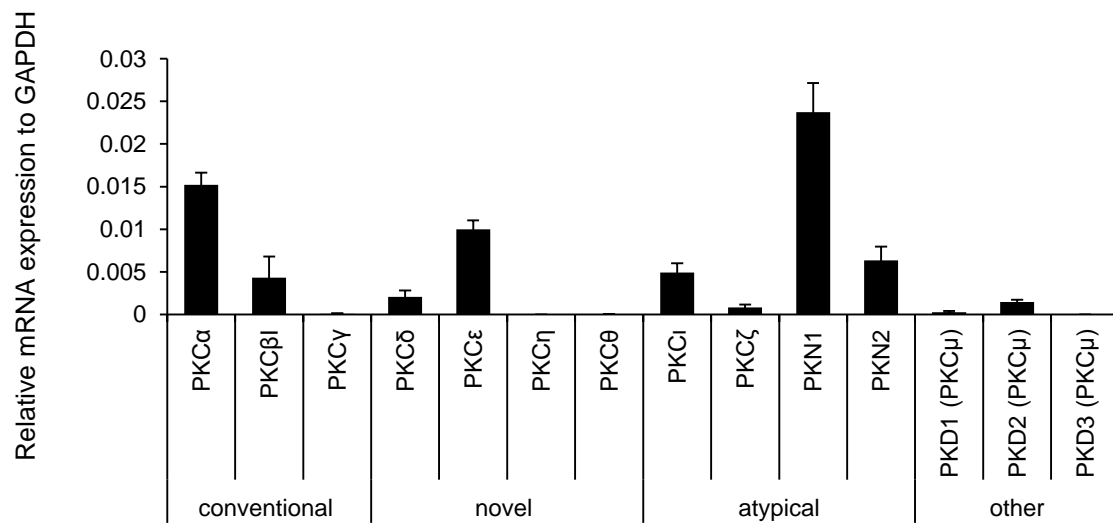

9

10 **Supplementary Figure S1. mRNA levels of PKC and PKD family enzymes in MIN6**

11 **cells.**

12 mRNA levels were measured by qRT-PCR and normalized to GAPDH using the comparative

13 CT method ( $2^{-\Delta\Delta C_t}$ ). Data are shown as means  $\pm$  SD of three experiments performed in

14 duplicate.

15

16 **Method**

17 **Quantitative real-time PCR (qRT-PCR) analyses for PKC and protein kinase D (PKD)**

18 Total RNA was extracted from MIN6 cells using ISOGEN (Nippon Gene, Toyama, Japan)  
19 according to the manufacturer's instructions. cDNAs were synthesized from 1 µg of total  
20 RNA. The reverse transcription reactions were performed at 42°C using a random primer and  
21 SuperScriptII reverse transcriptase (Life Technologies). The mixture was dissolved in 40 µl  
22 of distilled water and the resulting cDNA was used as the template for qRT-PCR using a  
23 Prism 7900HT sequence detector (Applied Biosystems, Carlsbad, CA, USA). Thermal  
24 cycling parameters were 2 min at 50°C, 10 min at 95°C, followed by 40 cycles of 95°C for 15  
25 sec and 60°C for 1 min. mRNA levels were analyzed with the comparative Ct method ( $2^{-\Delta\Delta C_t}$ )  
26 using *GAPDH* as the housekeeping gene. The TaqMan Gene Expression assays (Applied  
27 Biosystems) used were: Mm00440858\_m1 (*Prkca*), Mm00435749\_m1 (*Prkcb*),  
28 Mm00440861\_m1 (*Prkcg*), Mm00440891\_m1 (*Prkcd*), Mm00440894\_m1 (*Prkce*),  
29 Mm00435756\_m1 (*Prkch*), Mm01340228\_m1 (*Prkcq*), Mm00435769\_m1 (*Prkci*),  
30 Mm00776345\_g1 (*Prkcz*), Mm00723995\_m1 (*Pkn1*), Mm00618304\_m1 (*Pkn2*),  
31 Mm00435790\_m1 (*Prkd1*), Mm00626821\_m1 (*Prkd2*), Mm01232233\_m1 (*Prkd3*). For  
32 measuring *GAPDH*, the following primers and probes were used: Forward primer:  
33 5'-GTCATCATCTCCGCCCTT-3', Reverse primer: 5'-  
34 ATATTTCTCGTGGTTCACACCCA-3', TaqMan probe: 5'FAM-

35 TGCCGATGCCCCCATGTTTGT-3'.
